# Supplementary material for: Oxidized Calmodulin Kinase II Regulates Conduction Following Myocardial Infarction: A Computational Analysis
Source: PubMed Central journal article supplement (PMC2778128; doi:10.1371/journal.pcbi.1000583), 2009-12-04
Supplement: pcbi.1000583.s003.pdf [file pcbi.1000583.s003.pdf]

**Table S1. Model definitions and abbreviations.**

| <u>Abbreviation</u> | <u>Definition</u>                                                     |
|---------------------|-----------------------------------------------------------------------|
| BZ                  | Canine epicardial border zone                                         |
| NZ                  | Normal, remote region of infarcted heart                              |
| $I_{Na}$            | Fast $Na^+$ current, $\mu A/\mu F$                                    |
| $I_{Na,L}$          | Slowly inactivating late $Na^+$ current, $\mu A/\mu F$                |
| $I_{Ca(L)}$         | $Ca^{2+}$ current through the L-type $Ca^{2+}$ channel, $\mu A/\mu F$ |
| $I_{to1}$           | 4AP-sensitive transient outward $K^+$ current, $\mu A/\mu F$          |
| $I_{NaCa}$          | $Na^+$ - $Ca^{2+}$ exchanger, $\mu A/\mu F$                           |
| $I_{NaK}$           | $Na^+$ - $K^+$ pump, $\mu A/\mu F$                                    |
| $CT_{NaCl}$         | $Na^+$ - $Cl^-$ cotransporter, mmol/L per ms                          |
| $CT_{KCl}$          | $K^+$ - $Cl^-$ cotransporter, mmol/L per ms                           |
| SR                  | Sarcoplasmic reticulum                                                |
| JSR                 | Junctional SR                                                         |
| NSR                 | Network SR                                                            |
| SS                  | $Ca^{2+}$ subspace                                                    |
| $I_{rel}$           | $Ca^{2+}$ release from JSR to myoplasm, mmol/L per ms                 |
| $I_{up}$            | $Ca^{2+}$ uptake from myoplasm to NSR, mmol/L per ms                  |
| $I_{leak}$          | $Ca^{2+}$ leak from JSR to myoplasm, mmol/L per ms                    |
| $I_{ax}$            | Axial current                                                         |
| $I_{K,t}$           | Total transmembrane $K^+$ current                                     |
| $I_{Cl,t}$          | Total transmembrane $Cl^-$ current,                                   |
| $I_{stim}$          | Stimulus current, $\mu A/\mu F$                                       |
| $CaMKII_{active}$   | Fraction of active CaMKII subunits                                    |
| $f_{Bound}$         | Fraction of active CaMKII subunits with bound $Ca^{2+}$ /calmodulin   |
| $f_{Phos}$          | Fraction of active autophosphorylated CaMKII subunits                 |
| $f_{Ox}$            | Fraction of active oxidized CaMKII subunits                           |
| $f_{OxP}$           | Fraction of active oxidized/autophosphorylated CaMKII subunits        |
| $f_i$               | Fraction of inactive CaMKII subunits                                  |
| $\bar{G}_x$         | Maximum conductance of channel x, mS/ $\mu F$                         |

|                     |                                                                               |
|---------------------|-------------------------------------------------------------------------------|
| $V_m$               | Transmembrane potential, mV                                                   |
| $V_{m, dia}$        | End diastolic potential, mV                                                   |
| $[S]_o$ and $[S]_i$ | Extracellular and intracellular concentrations of ion S, respectively, mmol/L |
| $[Ca^{2+}]_{JSR}$   | $Ca^{2+}$ concentration in JSR, mmol/L                                        |
| $[Ca^{2+}]_{NSR}$   | $Ca^{2+}$ concentration in NSR, mmol/L                                        |
| $[Ca^{2+}]_{ss}$    | $Ca^{2+}$ concentration in subspace, mmol/L                                   |
| $[Ca^{2+}]_{ss,t}$  | Concentration of free and buffered intracellular $Ca^{2+}$ , mmol/L           |
| $V_{SS}$            | Volume of SS compartment, $\mu$ L.                                            |
| F                   | Faraday constant, 96,487 C/mol                                                |
| $A_{Cap}$           | Capacitive membrane area, $cm^2$                                              |
| $R_i$               | Axial resistance per unit length, $\Omega$ cm, $R_{myo} + R_g / \Delta x$     |
| $R_{myo}$           | Myoplasmic resistivity, 150 $\Omega$ cm                                       |
| $R_g$               | Gap junction resistance, 1.5 $\Omega$ cm <sup>2</sup>                         |
| $\Delta x$          | Spatial discretization element, 0.01 cm                                       |
