# Supplementary material for: Oxidized Calmodulin Kinase II Regulates Conduction Following Myocardial Infarction: A Computational Analysis
Source: PubMed Central journal article supplement (PMC2778128; doi:10.1371/journal.pcbi.1000583), 2009-12-04
Supplement: pcbi.1000583.s005.pdf [file pcbi.1000583.s005.pdf]

**Table S3.** CaMKII transition rate parameters.

| Parameter   | Value                                                           | References                     |
|-------------|-----------------------------------------------------------------|--------------------------------|
| $k_{IB}$    | $246 \text{ mM}^{-1} \text{ ms}^{-1}$                           | Meyer et al., Gaertner et al.* |
| $k_{BI}$    | $0.0022 \text{ ms}^{-1}$                                        | Meyer et al.                   |
| $k_{BOx}$   | $2.91 \times 10^{-4} \text{ } \mu\text{M}^{-1} \text{ ms}^{-1}$ | Erickson et al.*               |
| $k_{OxB}$   | $2.23 \times 10^{-5} \text{ ms}^{-1}$                           | -                              |
| $k_{PB}$    | $0.00003 \text{ ms}^{-1}$                                       | Hund et al.                    |
| $k_{POxP}$  | $k_{BOx}$                                                       | -                              |
| $k_{OxPP}$  | $k_{OxB}$                                                       | -                              |
| $k_{OxPOx}$ | $k_{PB}$                                                        | -                              |

\*Derived
