# Supplementary material for: Oxidized Calmodulin Kinase II Regulates Conduction Following Myocardial Infarction: A Computational Analysis
Source: PLOS journal article supplement (doi:10.1371/journal.pcbi.1000583), 2009-12-04
Supplement: S4 (10.1371/journal.pcbi.1000583.s004) [file journal.pcbi.1000583.s004]

**Table S2: Mathematical model initial conditions**

| Variable          | NZ value                            | BZ value                           |
|-------------------|-------------------------------------|------------------------------------|
| $V_m$             | -87.2162 mV                         | -86.1872 mV                        |
| $[Ca^{2+}]_i$     | $0.922820 \times 10^{-4}$<br>mmol/L | $1.31511 \times 10^{-4}$<br>mmol/L |
| $[Cl^-]_i$        | 19.4994 mmol/L                      | 19.1616 mmol/L                     |
| $[K^+]_i$         | 142.489 mmol/L                      | 140.177 mmol/L                     |
| $[Na^+]_i$        | 9.88936 mmol/L                      | 11.7219 mmol/L                     |
| $[Ca^{2+}]_{JSR}$ | 1.75282 mmol/L                      | 2.42834 mmol/L                     |
| $[Ca^{2+}]_{NSR}$ | 1.77902 mmol/L                      | 2.45508 mmol/L                     |
| $[Ca^{2+}]_{ss}$  | $0.961745 \times 10^{-4}$<br>mmol/L | $1.32944 \times 10^{-4}$<br>mmol/L |
| $CaMK_{active}$   | $3.64721 \times 10^{-4}$            | $2.39046 \times 10^{-5}$           |
| $f_{Bound}$       | $4.86283 \times 10^{-4}$            | $3.35299 \times 10^{-6}$           |
| $f_{Phos}$        | $8.38259 \times 10^{-9}$            | $5.48067 \times 10^{-12}$          |
| $f_{Ox}$          | 0                                   | $4.27796 \times 10^{-5}$           |
| $f_{OxP}$         | 0                                   | $6.99266 \times 10^{-11}$          |
| $f_l$             | 0.999514                            | 0.999954                           |
| $[Ca^{2+}]_o$     | 1.8 mmol/L                          | 1.8 mmol/L                         |
| $[Cl^-]_o$        | 100 mmol/L                          | 100 mmol/L                         |
| $[K^+]_o$         | 5.4 mmol/L                          | 5.4 mmol/L                         |
| $[Na^+]_o$        | 140 mmol/L                          | 140 mmol/L                         |
