# Supplementary material for: Oxidized Calmodulin Kinase II Regulates Conduction Following Myocardial Infarction: A Computational Analysis
Source: PLOS journal article supplement (doi:10.1371/journal.pcbi.1000583), 2009-12-04
Supplement: S6 (10.1371/journal.pcbi.1000583.s006) [file journal.pcbi.1000583.s006]

## Supplementary text

Christensen et al. Oxidized CaMKII regulates conduction. *PLoS Comput Biol.*

### Model equations for NZ and BZ fiber

Complete HRd control (NZ) and BZ model equations may be found in previous publications [1,2]. Here we provide equations and parameters that differ from the original models.

#### A. Transmembrane potential, $V_m$

Action potential propagation is simulated by discretizing the equation describing axial current flow along the fiber and solving numerically using the Crank-Nicholson implicit method.

$$-\frac{\partial I_{ax}}{\partial x} = \frac{a}{2R_i} \cdot \frac{\partial^2 V_m(x,t)}{\partial x^2} = C_m \frac{\partial V_m(x,t)}{\partial t} + \sum I_{ion}$$

The ends of the fiber are assumed to be sealed (no-flow boundary conditions,  $\partial V / \partial x = 0$  at first and last element of the fiber). To preserve conservation (and to simulate propagation using the algebraic method), axial current is assumed to carry  $K^+$  ions ( $I_m$  is added to the total  $K^+$  current) as previously recommended [3,4].

#### B. CaMKII activity

CaMKII activity is based on the model of Dupont et al.[5] with modifications to include oxidative activation as described recently [6]. Oxidation occurs from the  $Ca^{2+}$ /calmodulin bound state, as observed experimentally [6]. Also, the model includes a single autophosphorylation state rather than multiple states used in previous models [7-9]. Inclusion of an additional autonomous (phosphorylated but no bound  $Ca^{2+}$ /CaM) state was found to have no impact on model behavior (state occupancy  $< 0.001\%$ , not shown) and was therefore not included in the final model. We also include a state where a subunit is both oxidized and phosphorylated ( $C_{OxP}$ ). Rate constants are taken from the literature [2,8-11] or are chosen to fit experimental data (see Figure 3 and Table S3). Following the formulation of Dupont et al., the autophosphorylation rate is a phenomenological function of total CaMKII activity chosen to fit experimental dependence of autonomous activity on calmodulin [7]. The relative activity of the  $Ca^{2+}$ /calmodulin bound active state ( $C_{Bound}$ ) is taken from Dupont et al. to be less than the relative activity of the autophosphorylated state ( $C_{Phos}$ ) [5]. We assume relative activity of 50% for oxidized CaMKII ( $C_{Ox}$ ) consistent with experiment [6].

Our model assumes that only saturated CaM (4  $Ca^{2+}$  bound to CaM) activates CaMKII. However, a previous modeling study has shown that nonsaturated calmodulin (2  $Ca^{2+}$  bound to CaM) binding to CaMKII with subsequent recruitment of 2  $Ca^{2+}$  is an alternative (perhaps preferable) pathway for kinase activation [9]. To determine the response of our model to nonsaturated CaM, we incorporated a more detailed and well-validated representation of  $Ca^{2+}$  binding to CaM includes apoCaM, nonsaturated CaM (2 $Ca^{2+}$ /CaM), and saturated CaM (4 $Ca^{2+}$ /CaM) [9]. In this model, 2 $Ca^{2+}$ /CaM binding to CaMKII may activate the kinase only after subsequent recruitment of 2  $Ca^{2+}$ . This modified pathway was incorporated into our BZ model which was paced to steady-state at a cycle length of 500 ms. We also performed simulations using a model where only

## Supplementary text

Christensen et al. Oxidized CaMKII regulates conduction. *PLoS Comput Biol*.

saturated CaM ( $4\text{Ca}^{2+}/\text{CaM}$  but not  $2\text{Ca}^{2+}/\text{CaM}$ ) could bind to CaMKII. Importantly, 1  $\mu\text{M}$  ROS resulted in a similar increase in CaMKII activity independent of whether or not  $2\text{Ca}^{2+}/\text{CaM}$  could bind to CaMKII (21% and 18% maximal activity, respectively, compared to 0.72% with  $[\text{ROS}] = 0 \mu\text{M}$ , not shown). Thus, we have opted to retain our simplified scheme of  $\text{Ca}^{2+}/\text{CaM}$  binding for the remaining simulations.

$$\frac{df_{\text{Bound}}}{dt} = k_{\text{IB}} \cdot \text{calm} \cdot f_{\text{I}} + k_{\text{PB}} \cdot f_{\text{Phos}} + k_{\text{OxB}} \cdot f_{\text{Ox}} - (k_{\text{BI}} + k_{\text{BOx}} \cdot \text{ROS}) \cdot f_{\text{Bound}} - k_{\text{A}} \cdot f_{\text{Bound}}$$

$$\text{calm} = \overline{\text{calm}} \cdot (1 + (0.005 / [\text{Ca}^{2+}]_{\text{ss}})^h)^{-1}$$

$$\overline{\text{calm}} = 60 \text{ nM is free calmodulin concentration [12]; } h = 4$$

$$\frac{df_{\text{Phos}}}{dt} = k_{\text{A}} \cdot f_{\text{Bound}} + k_{\text{OxPP}} \cdot f_{\text{OxP}} - (k_{\text{PB}} + k_{\text{POxP}} \cdot \text{ROS}) \cdot f_{\text{Phos}}$$

$$k_{\text{A}} = k_{\text{BI}} \cdot T_{\text{CaMK}} / (T_{\text{CaMK}} + 0.01851)$$

$$T_{\text{CaMK}} = k_{\text{BI}} / k_{\text{IB}} \cdot (1 / (f_{\text{Bound}} + f_{\text{Phos}} + f_{\text{Ox}} + f_{\text{OxP}}) - 1)^{-1}$$

$$\frac{df_{\text{Ox}}}{dt} = k_{\text{BOx}} \cdot \text{ROS} \cdot f_{\text{Bound}} + k_{\text{OxPOx}} \cdot f_{\text{OxP}} - (k_{\text{OxB}} + k_{\text{A}}) \cdot f_{\text{Ox}}$$

$$\frac{df_{\text{OxP}}}{dt} = k_{\text{A}} \cdot f_{\text{Ox}} + k_{\text{POxP}} \cdot \text{ROS} \cdot f_{\text{Phos}} - (k_{\text{OxPP}} + k_{\text{OxPOx}}) \cdot f_{\text{OxP}}$$

Unless otherwise stated,  $\text{ROS} = 1.0 \mu\text{M}$  for BZ model and  $0.0 \mu\text{M}$  for NZ.

$$f_{\text{I}} = 1 - f_{\text{Bound}} - f_{\text{Phos}} - f_{\text{Ox}} - f_{\text{OxP}}$$

$$\text{CaMKII}_{\text{active}} = C_{\text{Bound}} \cdot f_{\text{Bound}} + C_{\text{Phos}} \cdot f_{\text{Phos}} + C_{\text{Ox}} \cdot f_{\text{Ox}} + C_{\text{OxP}} \cdot f_{\text{OxP}}$$

$$C_{\text{Bound}} = 0.75; C_{\text{Phos}} = C_{\text{OxP}} = 1.0; C_{\text{Ox}} = 0.5$$

### C. L-type $\text{Ca}^{2+}$ current, $\text{I}_{\text{Ca,L}}$

$$K_{m,\text{CaMK}} = 0.2; h_{\infty,f} = h_{\infty,fca} = 2.0$$

### D. SR $\text{Ca}^{2+}$ release, $\text{I}_{\text{rel}}$

$$K_{m,\text{CaMK}} = 0.2$$

### E. Fast $\text{Na}^+$ current, $\text{I}_{\text{Na}}$

$$K_{m,\text{CaMK}} = 0.3$$

### F. Late $\text{Na}^+$ current, $\text{I}_{\text{Na,l}}$

$$K_{m,\text{CaMK}} = 0.3$$

### G. $\text{K}^+-\text{Cl}^-$ cotransporter, $\text{CT}_{\text{KCl}}$

We adopt conductance values for  $\text{CT}_{\text{KCL}}$  and  $\text{CT}_{\text{NaCl}}$ , used by Decker et al. [13].

$$\overline{\text{CT}}_{\text{KCl}} = 1.77 \times 10^{-5} \text{ mmol/L per ms}$$

### H. $\text{Na}^+-\text{Cl}^-$ cotransporter, $\text{CT}_{\text{NaCl}}$

$$\overline{\text{CT}}_{\text{NaCl}} = 2.46108 \times 10^{-5}$$

## Supplementary text

Christensen et al. Oxidized CaMKII regulates conduction. *PLoS Comput Biol.*

### I. $\text{Na}^+/\text{K}^+$ ATPase, $I_{\text{NaK}}$

To maintain resting  $[\text{K}^+]_i$  similar to original HRd model, the following value is used for the maximal pump current.

$$\bar{I}_{\text{NaK}} = 0.93 \text{ mS}/\mu\text{F}$$

## References

1. Hund TJ, Rudy Y (2004) Rate dependence and regulation of action potential and calcium transient in a canine cardiac ventricular cell model. *Circulation* 110: 3168-3174.
2. Hund TJ, Decker KF, Kanter E, Mohler PJ, Boyden PA, et al. (2008) Role of activated CaMKII in abnormal calcium homeostasis and  $I_{\text{Na}}$  remodeling after myocardial infarction: Insights from mathematical modeling. *J Mol Cell Cardiol* 45: 420-428.
3. Ten Tusscher KH, Noble D, Noble PJ, Panfilov AV (2003) A model for human ventricular tissue. *Am J Physiol Heart Circ Physiol* 286: H1573-1589.
4. Hund TJ, Kucera JP, Otani NF, Rudy Y (2001) Ionic charge conservation and long-term steady state in the Luo-Rudy dynamic model of the cardiac cell. *Biophys J* 81: 3324-3331.
5. Dupont G, Houart G, De Koninck P (2003) Sensitivity of CaM kinase II to the frequency of  $\text{Ca}^{2+}$  oscillations: a simple model. *Cell calcium* 34: 485-497.
6. Erickson JR, Joiner ML, Guan X, Kutschke W, Yang J, et al. (2008) A dynamic pathway for calcium-independent activation of CaMKII by methionine oxidation. *Cell* 133: 462-474.
7. Dupont E, Matsushita T, Kaba RA, Vozzi C, Coppen SR, et al. (2001) Altered connexin expression in human congestive heart failure. *J Mol Cell Cardiol* 33: 359-371.
8. Hashambhoy YL, Winslow RL, Greenstein JL (2009) CaMKII-induced shift in modal gating explains L-type  $\text{Ca}^{2+}$  current facilitation: a modeling study. *Biophys J* 96: 1770-1785.
9. Saucerman JJ, Bers DM (2008) Calmodulin mediates differential sensitivity of CaMKII and calcineurin to local  $\text{Ca}^{2+}$  in cardiac myocytes. *Biophys J* 95: 4597-4612.
10. Gaertner TR, Kolodziej SJ, Wang D, Kobayashi R, Koomen JM, et al. (2004) Comparative analyses of the three-dimensional structures and enzymatic properties of  $\alpha$ ,  $\beta$ ,  $\gamma$  and  $\delta$  isoforms of  $\text{Ca}^{2+}$ -calmodulin-dependent protein kinase II. *J Biol Chem* 279: 12484-12494.
11. Meyer T, Hanson PI, Stryer L, Schulman H (1992) Calmodulin trapping by calcium-calmodulin-dependent protein kinase. *Science* 256: 1199-1202.

**Supplementary text**

Christensen et al. Oxidized CaMKII regulates conduction. *PLoS Comput Biol.*

12. Wu X, Bers DM (2007) Free and bound intracellular calmodulin measurements in cardiac myocytes. *Cell Calcium* 41: 353-364.
13. Decker KF, Heijman J, Silva JR, Hund TJ, Rudy Y (2009) Properties and ionic mechanisms of action potential adaptation, restitution and accommodation in canine epicardium. *Am J Physiol Heart Circ Physiol.*
